# 1 Consolidation alters motor 2 sequence-specific distributed 3 representations.

4 **Basile Pinsard** <sup>\*1,2</sup>, **Arnaud Boutin** <sup>2,3</sup>, **Ella Gabitov** <sup>2,3</sup>, **Ovidiu Lungu** <sup>2</sup>,  
5 **Habib Benali** <sup>1,5</sup>, **Julien Doyon** <sup>2,3,4</sup>

\*For correspondence:

[basile.pinsard@gmail.com](mailto:basile.pinsard@gmail.com) (BP)

6 <sup>1</sup> *Sorbonne Université, CNRS, INSERM, Laboratoire d'Imagerie Biomédicale, LIB, 75006 Paris, France;* <sup>2</sup> *Functional Neuroimaging Unit, Centre de Recherche de l'Institut Universitaire de*  
7 *Gériatrie de Montréal, Montreal, Canada;* <sup>3</sup> *McConnell Brain Imaging Centre, Montreal*  
8 *Neurological Institute, McGill University, Montreal, Canada;* <sup>4</sup> *Department of Neurology and*  
9 *Neurosurgery, Montreal Neurological Institute, McGill University, Montreal, Canada;* <sup>5</sup> *PERFORM*  
10 *Centre, Concordia University, Montreal, Canada*  
11

12  
13 **Abstract** FMRI studies investigating the acquisition of sequential motor skills in  
14 humans have revealed learning-related functional reorganizations of the cortico-striatal  
15 and cortico-cerebellar motor systems in link with the hippocampus. Yet, the functional  
16 significance of these activity level changes is not fully understood as they convey the  
17 evolution of both sequence-specific knowledge and unspecific task expertise. Moreover,  
18 these changes do not specifically assess the occurrence of learning-related plasticity. To  
19 address these issues, we investigated local circuits tuning to sequence-specific  
20 information using multivariate distances between patterns evoked by consolidated or  
21 newly acquired motor sequences production. Results reveal that representations in  
22 dorsolateral striatum, prefrontal and secondary motor cortices are greater when  
23 executing consolidated sequences than untrained ones. By contrast, sequence  
24 representations in the hippocampus and dorsomedial striatum are less engaged. Our  
25 findings show, for the first time in humans, that complementary sequence-specific motor  
26 representations evolve distinctively during critical phases of skill acquisition and  
27 consolidation.

## 28 29 Introduction

30 Animals and humans are able to acquire and automatize new sequences of movements,  
31 hence allowing them to expand and update their repertoire of complex goal-oriented  
32 motor actions for long-term use. To investigate the mechanisms underlying this type  
33 of procedural memory in humans, a large body of behavioral studies has used motor  
34 sequence learning (MSL) tasks designed to test the ability to perform temporally ordered  
35 and coordinated movements, learned either implicitly or explicitly and has assessed their

36 performances in different phases of the acquisition process (Korman et al. 2003; Abra-  
37 hamse et al. 2013; Diedrichsen and Kornysheva 2015; Verwey et al. 2015). While practice  
38 of an explicit MSL task leads to substantial within-session execution improvements, there  
39 is now ample evidence indicating that between-session maintenance, and even increases,  
40 in performance can be observed after a night of sleep (Nettersheim et al. 2015; Landry et  
41 al. 2016), while performance are unstable and tends to decay during an equal period of  
42 wake (Doyon et al. 2009b; Brawn et al. 2010; Nettersheim et al. 2015; Landry et al. 2016).  
43 Therefore, it is thought that sleep favors reprocessing of the motor memory trace, thus  
44 promoting its consolidation for long-term skill proficiency (Fischer et al. 2002; see King et  
45 al. 2017; Doyon et al. 2018 for recent in-depth reviews).

46 Functional magnetic resonance imaging (fMRI) studies using General-Linear-Model (GLM)  
47 contrasts of activation have also revealed that MSL is associated with the recruitment of an  
48 extended network of cerebral (Hardwick et al. 2013), cerebellar and spinal regions (Vahdat  
49 et al. 2015), whose contributions differentiate as learning progresses (Karni et al. 1998;  
50 Dayan and Cohen 2011; Doyon et al. 2018). In fact, critical plastic changes (Ungerleider et  
51 al. 2002; Doyon and Benali 2005) are known to occur within the initial training session,  
52 as well as during the offline consolidation phase, the latter being characterized by a  
53 functional “reorganization” of the nervous system structures supporting this type of  
54 procedural memory function (Rasch and Born 2008; Born and Wilhelm 2012; Albouy et al.  
55 2013b; Bassett et al. 2015; Dudai et al. 2015; Fogel et al. 2017; Vahdat et al. 2017). More  
56 specifically, MSL practice is known to activate a cortical, associative striatal and cerebellar  
57 motor network which is assisted by the hippocampus during the initial “fast-learning”  
58 phase (Albouy et al. 2013b). Yet, when approaching asymptotic behavioral performance  
59 after longer practice, activity within the hippocampus and cerebellum decreases while  
60 activity within the sensorimotor striatum increases (Doyon et al. 2002), both effects  
61 conveying the transition to the “slow-learning” phase. The same striatal regions are  
62 reactivated during sleep spindles (Fogel et al. 2017) contributing to the progressive  
63 emergence of a reorganized network (Debas et al. 2010; Vahdat et al. 2017), which is  
64 further stabilized when additional MSL practice extending over multiple days is separated  
65 by consolidation periods (Lehéricy et al. 2005).

66 A critical issue typically overlooked by previous MSL neuroimaging research using GLM-  
67 based activation contrasts, however, is that learning-related changes in brain activity do  
68 reflect the temporal evolution of recruited processes during blocks of practice, only some  
69 of which may be specifically related to plasticity induced by MSL. For instance, increases in  
70 activity could not only signal a greater implication of the circuits specialized in movement  
71 sequential learning *per se*, but could also result from the inherent faster execution of  
72 the motor task. Likewise, a decrease in activity could either indicate some form of  
73 optimization and greater efficiency of the circuits involved in executing the task (Wu et  
74 al. 2004), or could show the reduced recruitment of non-specific networks supporting  
75 the acquisition process. Therefore, even with the use of control conditions to dissociate  
76 sequence-specific from non-specific processes (Orban et al. 2010), the observed large-  
77 scale activation differences associated with different learning phases do not necessarily  
78 provide direct evidence of plasticity related to the processing of a motor sequence-specific  
79 representation (Berlot et al. 2018). Furthermore, it is also conceivable that these plastic  
80 changes could even occur locally without significant changes in the GLM-based regional

81 activity level. Finally, in most studies investigating the neural substrate mediating the  
82 consolidation process of explicit MSL, the neural changes associated with this mnemonic  
83 mechanism are assessed by contrasting brain activity level of novice participants between  
84 their initial training and a delayed practice session, Therefore, they measure not only  
85 plasticity for sequence-specific (e.g. optimized chunks), but also task-related expertise  
86 (e.g. habituation to experimental apparatus, optimized execution strategies, attentional  
87 processes). The latter expertise is notably observed when participants practice two  
88 motor sequences in succession and the initial performance during sequence execution is  
89 significantly better for the subsequent than for the first sequence.

90 To address these specificity limitations, multivariate pattern analysis (MVPA) has been pro-  
91 posed to evaluate how local patterns of activity are able to reliably discriminate between  
92 stimuli or evoked memories of the same type over repeated occurrences, hence allowing  
93 to test information-based hypotheses that GLM contrasts cannot inquire (Hebart and  
94 Baker 2017). In the MSL literature, only a few studies have used such MVPA approaches to  
95 identify the regions that specialize in processing the representation of learned motor se-  
96 quences (Wiestler et al. 2011; Wiestler and Diedrichsen 2013; Kornysheva and Diedrichsen  
97 2014; Nambu et al. 2015; Yokoi et al. 2017). These studies, however, mainly focused on  
98 extensively practiced sequences over multiple training sessions across multiple days. For  
99 instance, in a recent study covering dorsal cerebral cortices only (Wiestler and Diedrichsen  
100 2013), cross-validated classification accuracy was measured separately on activity patterns  
101 evoked by the practice of trained and untrained sets of sequences. The authors showed  
102 that the extended training increased sequence discriminability in a network spanning  
103 bilaterally the primary and secondary motor as well as parietal cortices. In another study  
104 (Nambu et al. 2015) that aimed to analyze separately the preparation and execution of se-  
105 quential movements, representations of extensively trained sequences were identified in  
106 the contralateral dorsal premotor and supplementary motor cortices during preparation,  
107 while representations related to the execution were found in the parietal cortex ipsilater-  
108 ally, the premotor and motor cortices bilaterally as well as the cerebellum. In both studies,  
109 the regions carrying sequence-specific representations overlapped only partly with those  
110 identified using GLM-based measures, hence illustrating the fact that coarser differences  
111 in activation between novel and trained sequences does not necessarily provide evidence  
112 of plasticity for sequential information. However, the classification-based measures they  
113 used may have biased their parametric statistical results by violating both the normality  
114 assumption and theoretical null-distribution (Allefeld et al. 2015; Combrisson and Jerbi  
115 2015; Jamalabadi et al. 2016; Varoquaux 2017) and may have thus been suboptimal in  
116 detecting representational changes (Walther et al. 2016).

117 As a part of a larger research program, the present study aimed to address both the  
118 critical issues overlooked by previous research investigating the early phases of MSL  
119 consolidation with GLM-based approach described above, as well as the limitations  
120 encountered when using classifier-based MVPA methods. Specifically, we employed a  
121 recently developed MVPA approach (Nili et al. 2014) that is unbiased and more sensitive  
122 to continuous representational changes (Walther et al. 2016), such as those that occur  
123 in the early stage of MSL and consolidation (Albouy et al. 2013c). Our experimental  
124 manipulation allowed to isolate sequence-specific plasticity, by extracting patterns evoked  
125 through practice of both consolidated and new sequences at the same level of task

126 expertise and by computing this novel multivariate distance metric using a searchlight  
127 approach over the whole brain in order to cover cortical and subcortical regions critical  
128 to MSL. Based on theoretical models (Albouy et al. 2013b; Doyon et al. 2018) derived  
129 from imaging and invasive animal studies, we hypothesized that offline consolidation  
130 following training would induce greater cortical and striatal as well as weaker hippocampal  
131 sequence-specific representations.

## 132 Results

133 To investigate changes in the neural representations of motor sequences occurring during  
134 learning, young healthy participants ( $n=18$ ) practiced two 5-element sequences of finger  
135 movements (executed through button presses) separately on two consecutive days. On  
136 the third day, participants were required to execute again the same two sequences, then  
137 considered to be consolidated, together with two new 5-element untrained sequences.  
138 This practice session consisted in 64 pseudo-randomly ordered short blocks split in two  
139 runs, with 16 blocks of each sequence. All four sequences were executed using their  
140 non-dominant left hand while functional MRI data was acquired.

### 141 Behavioral performance

142 We analyzed the behavioral performance related to the four different sequences using a  
143 repeated-measure mixed-effects model. As expected, new sequences were performed  
144 more slowly ( $\beta = .365, SE = 0.047, p < .001$ ) and less accurately ( $\beta = -0.304, SE = 0.101, p <$   
145  $.001$ ) than the consolidated ones. Significant improvement across blocks was observed  
146 for new sequences as compared to consolidated sequences in term of change of speed  
147 ( $\beta = -0.018, SE = 0.002, p < .001$ ), thus showing an expected learning curve visible in  
148 fig. 1. Yet accuracy did not show significant improvement ( $\beta = 0.014, SE = 0.010, p = 0.152$ )  
149 likely explained by the limited precision of this measure that ranges discretely from 0 to  
150 5. By contrast, the consolidated sequences did not show significant changes in speed  
151 ( $\beta = -0.006, SE = 0.005, p = 0.192$ ) nor accuracy ( $\beta = -0.006, SE = 0.057, p = 0.919$ ), the  
152 asymptotic performances being already reached through practice and the consolidation  
153 process.

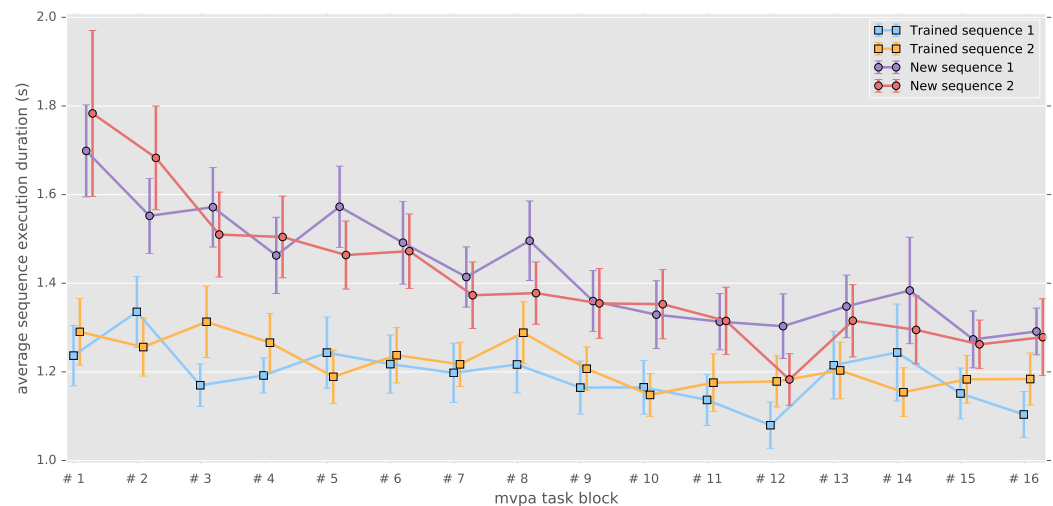

**Figure 1.** Correct sequence durations (average and standard error of the mean) across the MVPA task blocks.

154 Importantly, there were also no significant differences between the two consolidated se-  
155 quences in term of speed ( $\beta = 0.031$ ,  $SE = 0.026$ ,  $p = 0.234$ ) and accuracy ( $\beta = -0.030$ ,  $SE =$   
156  $0.111$ ,  $p = 0.789$ ), nor between the two new sequences speeds ( $\beta = 0.025$ ,  $SE = 0.045$ ,  $p =$   
157  $0.577$ ) and accuracies ( $\beta = -0.245$ ,  $SE = 0.138$ ,  $p = 0.076$ ).

## 158 **A common distributed network for sequence representation irre-** 159 **spective of learning stage**

160 From the preprocessed functional MRI data we extracted patterns of activity for each  
161 block of practice, and computed a cross-validated Mahalanobis distance (Nili et al. 2014;  
162 Walther et al. 2016) using a Searchlight approach (Kriegeskorte et al. 2006) over brain  
163 cortical surfaces and subcortical regions of interest. Such multivariate distance, when  
164 positive, demonstrate that there is a stable difference in activity patterns between the  
165 conditions compared, and thus reflect the level of discriminability between these condi-  
166 tions. To assess true patterns and not mere global activity differences, we computed this  
167 discriminability measure for sequences that were at the same stage of learning, thus sepa-  
168 rately for consolidated and new sequences. From the individual discriminability maps, we  
169 then measured the prevalence of discriminability at the group level, using non-parametric  
170 testing with a Threshold-Free-Cluster-Enhancement approach (TFCE) (Smith and Nichols  
171 2009) to enable locally adaptive cluster-correction.

172 To extract the brain regions that show discriminative activity patterns for specific sequence  
173 during both learning stages, we then submitted these separate group results for the  
174 consolidated and new sequences to a minimum-statistic conjunction. A large distributed  
175 network (fig. 2) displayed significant discriminability, including the primary visual, as well  
176 as the posterior parietal, primary and supplementary motor, premotor and dorsolateral  
177 prefrontal cortices.(see the statistical maps for each learning stage separately in the  
178 Supplementary material (fig. S1,fig. S2).

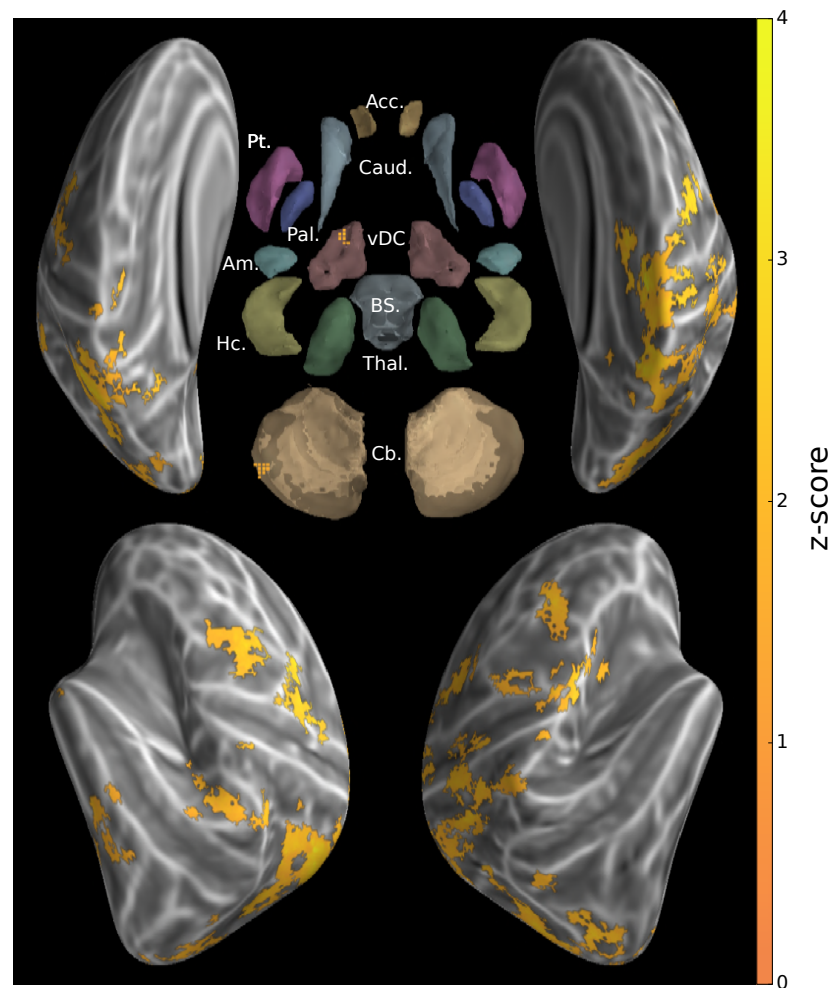

**Figure 2.** Group searchlight conjunction of new and consolidated sequences discriminability maps (z-score thresholded at  $p < .05$  TFCE-cluster-corrected) showing a large distributed cortical network showing sequence discriminative patterns at both learning stages; Regions of interest with Freesurfer colors: Acc.:Accumbens; Pt.:Putamen; Caud.:Caudate; Pal.:Pallidum; vDC:ventral Diencephalon; Am.:Amygdala; Hc.:Hippocampus; Thal.:Thalamus; Cb.:Cerebellum; BS:brain-stem

179 **Reorganization of the distributed sequence representation after**  
180 **memory consolidation**

181 In order to evaluate the reorganization of sequence representation undergone by con-  
182 solidation at the group level, the consolidated and new sequence discriminability maps  
183 from all participants were submitted to a non-parametric pairwise t-test with TFCE. To  
184 ascertain that a greater discriminability in one stage versus the other was supported by a  
185 significant level of discriminability within that stage, we then calculated the conjunction of  
186 the contrast maps with the consolidated and new sequences group results, respectively  
187 with the positive and negative contrast differences (fig. 3).

188 Discriminability between the consolidated sequences was significantly higher than that  
189 between the new sequences in bilateral sensorimotor putamen, thalamus and anterior

190 insula, as well as in the ipsilateral cerebellar lobule IX, posterior cingulate and parietal  
191 cortices, and contralaterally in the lateral and dorsal premotor, supplementary motor,  
192 frontopolar and dorsolateral prefrontal cortices in addition to cerebellar Crus I. By con-  
193 trast, the pattern dissimilarity was higher for the new sequences in bilateral hippocampi  
194 as well as the body of the caudate nuclei, subthalamic nuclei, and cerebellar Crus II  
195 ipsilaterally. Although striatal activity patterns differentiating newly acquired sequences  
196 were found in contralateral putamen (fig. S1), this discriminability was significantly larger  
197 for consolidated sequences in sensorimotor regions of the putamen bilaterally.

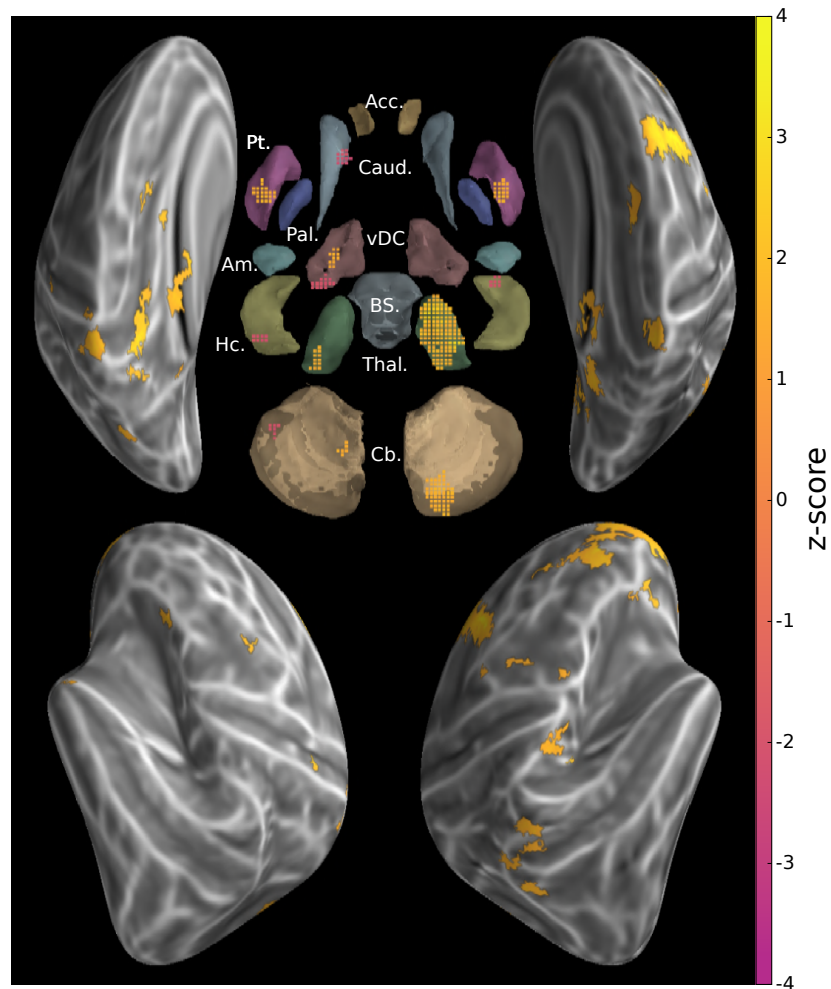

**Figure 3.** Conjunction of group searchlight contrast (paired t-test) between consolidated and new sequences discriminability maps and separate group discriminability maps for new and consolidated sequences (z-score thresholded at  $p < .05$  TFCE-cluster-corrected) showing a reorganization of the distributed memory trace between these two stages; Acc.: Accumbens; Pt.:Putamen; Caud.:Caudate; Pal.:Pallidum; vDC:ventral Diencephalon; Am.:Amygdala; Hc.:Hippocampus; Thal.:Thalamus; Cb.:Cerebellum; BS:brain-stem

## 198 Discussion

199 In the present study, we aimed to identify the brain networks whose activity patterns  
200 differentiate between representations of multiple motor sequences during their exe-  
201 cution in different phases of learning (newly learned vs consolidated). Using an MVPA  
202 approach, we considered that stable local patterns of activity could be used as proxy for  
203 the specialization of neuronal circuits supportive of the efficient retrieval and expression  
204 of sequential motor memory traces. To investigate the differential pattern strength, we  
205 computed novel unbiased multivariate distance and applied robust permutation-based  
206 statistics with adaptive cluster correction.

### 207 **A distributed network for the representation of finger motor se-** 208 **quence**

209 Our results provide evidence for an extended network of brain regions that shows re-  
210 liable discrimination of sequence-specific activity patterns for both the consolidated  
211 and novel sequences. At the cortical level, we found a network encompassing the sup-  
212plementary motor and premotor areas as well as posterior parietal cortices bilaterally  
213 and contralateral somatosensory motor cortex. These findings are consistent with ear-  
214lier MVPA investigations (Wiestler and Diedrichsen 2013; Nambu et al. 2015). Indeed,  
215 similar discriminative power of motor sequence representations within the ipsilateral  
216 premotor and parietal cortices has previously been described (Wiestler and Diedrichsen  
217 2013; Waters-Metenier et al. 2014; Waters et al. 2017), notably when the non-dominant  
218 hand is used for fine dexterous manual skills. Interestingly, we also found significant  
219 neural representations for both learning stages in the contralateral primary motor and  
220 somatosensory (M1/S1) cortices, more specifically around the hand knob area (Yousry  
221 et al. 1997) for which finger somatotopy is measurable using fMRI (Ejaz et al. 2015). The  
222 latter results suggest that these primary cortical regions play a critical role in building  
223 experience-related motor sequence memory traces. Yet such an interpretation must be  
224 taken with caution, as it has recently been reported that the capacity to discriminate  
225 between sequences based upon signals from these regions could simply be due to the  
226 stronger activity evoked by the first finger press in the sequence, and not to activity from  
227 the whole finger sequence (Yokoi et al. 2017). Yet although conjectural, we do not believe  
228 that such an effect can explain our pattern of results because, while the newly learned  
229 sequences began with different fingers, both consolidated sequences were discriminated  
230 despite the fact that the first finger presses were the same. Finally, while being located  
231 around the hand knob, the spatial extent of the M1/S1 representation in our study was  
232 smaller compared to that found by Wiestler and Diedrichsen (2013). This may be due,  
233 however, to differences in our design, notably in the uninterrupted repetition of the motor  
234 sequence during practice, and in the fact that none of our sequences engaged the thumb,  
235 which has a more distinctive M1/S1 cortical representation than the individual fingers  
236 (Ejaz et al. 2015).

237 The conjunction of new and consolidated sequences discriminability maps further re-  
238 vealed that a common cortical processing network, including non-motor primary and  
239 associative regions, carries sequential information across learning stages, that can origi-  
240 nate from visually presented instruction and short-term-memory to motor sequence



241 production. Herein, the visual occipital cortices, likely reflecting processing of the visual  
242 stimuli as low-level visual mapping of shapes (Miyawaki et al. 2008; Pilgramm et al. 2016),  
243 as well as the ventro-temporal regions, known to support higher level Arabic number  
244 representation (Shum et al. 2013; Peters et al. 2015) were found to discriminate between  
245 sequences in both stages of learning (fig. 2). The dorsolateral prefrontal cortex (DLPFC),  
246 which also exhibited pattern discriminability, was suggested previously to process the  
247 sequence spatial information in working memory, preceding motor command (Robertson  
248 et al. 2001). In fact, we believe that the cognitive processing required in our task, implying  
249 notably to switch between sequences, to maintain them in working memory and to inhibit  
250 competing ones, could have magnified this frontal associative representation in our study.

251 In sum, the regions found to carry sequence information regardless of the learning phase  
252 in the present study show some overlap with the network known to be implicated in MSL,  
253 such as primary and secondary motor cortices, as typically revealed in activation-based  
254 studies (Doyon et al. 2009b; Dayan and Cohen 2011; Hardwick et al. 2013). However,  
255 we also found significant representations in the occipital, temporal and insular cortices.  
256 This discrepancy can be attributable to the shift from an activation-based inference to  
257 one based on the presence of sequential information in activity patterns, but also by the  
258 recruitment of additional regions for the processing of this information in stimuli and its  
259 maintenance in working memory required by the task.

## 260 **Cortico-subcortical representational reorganization underlying** 261 **memory consolidation following MSL**

262 By contrasting the maps of multivariate distances for consolidated and newly acquired  
263 sequences, we identified the networks that reveal increased versus decreased discrim-  
264 inability of sequential representations in the early stages of the MSL consolidation (fig. 3).

265 At the cortical level, we found that the contralateral premotor and bilateral parietal regions  
266 showed a stronger representation for consolidated sequences. This pattern likely reflects  
267 that the tuning of these neural populations to coordinated movements is consolidated  
268 early after learning (Pilgramm et al. 2016; Makino et al. 2017; Yokoi et al. 2017), as  
269 was previously observed when contrasting sequence that underwent a longer training  
270 to new ones (Wiestler and Diedrichsen 2013). Importantly, no significant changes in  
271 representational magnitude were found in the contralateral primary somatosensory  
272 cortex after consolidation. This is in line with the fact that M1 representational geometry  
273 has been shown to be strongly shaped by ecological finger co-activations (Ejaz et al.  
274 2015), and to be resistant to extensive training of a sequence built on a new co-activation  
275 structure (Beukema et al. 2018). While the role of the motor cortex in MSL is undeniable,  
276 its plasticity in consolidation is still debated (Omriani et al. 2017). In fact, recent results  
277 revealed that after a M1 insult or even rapidly after M1 inactivation, a trained motor skill  
278 can still be expressed (Kawai et al. 2015; Bollu et al. 2018) arguing for its complementary,  
279 redundant and partially independent representation in subcortical regions.

280 Interestingly, significant differences at the subcortical level were found in bilateral puta-  
281 men and more specifically in their sensorimotor regions. This is consistent with findings  
282 from activation studies that reported increased functional activity after consolidation in

283 this structure (Debas et al. 2010, 2014; Albouy et al. 2013b; Fogel et al. 2017; Vahdat et  
284 al. 2017). Significant representational changes were also found in the bilateral thalami,  
285 and could reflect the relay of information between the cortex and cerebellum, striatum or  
286 spinal regions (Doyon et al. 2009a; Haber and Calzavara 2009). Finally, representation  
287 changes were detected in the cerebellum, including ipsilateral Lobule IX, shown to corre-  
288 late with sequential skill performance (Orban et al. 2010; Tomassini et al. 2011) as well as  
289 contralateral Crus II which connectivity with prefrontal cortex is thought to support motor  
290 functions (Ramnani 2006). However, no significant difference was observed in Lobule V of  
291 the cerebellum that is known to carry finger somatotopic representations (Wiestler et al.  
292 2011) and to show global activation during practice (Doyon et al. 2002).

293 Concurrently with the representational increase in the above-mentioned network, we  
294 found only a few disparate regions that showed decreased sequence discrimination,  
295 namely the caudate nuclei, subthalamic nuclei and cerebellar Crus II ipsilaterally as  
296 well as bilateral hippocampi. Hippocampal activation in early learning has formerly  
297 been hypothesized to support the temporary storage of novel explicitly acquired motor  
298 sequence knowledge and to contribute to the reactivations of the distributed network  
299 during offline periods and sleep in particular. Yet such contribution of the hippocampus  
300 has been shown to be progressively disengaging afterward (Albouy et al. 2013b), and  
301 thus our results are consistent with the idea of the hippocampus playing a transient  
302 supportive role in early MSL, notably in encoding sequential information (Davachi and  
303 DuBrow 2015). Our findings of a differential implication of dorsomedial and dorsolateral  
304 striatum in sequence representation during learning and expression of a mastered skill  
305 specifies the changes in activity in these regions in the course of MSL described by earlier  
306 studies (Lehéricy et al. 2005; François-Brosseau et al. 2009; Jankowski et al. 2009; Reithler  
307 et al. 2010; Corbit et al. 2017; Fogel et al. 2017; Kupferschmidt et al. 2017). Indeed,  
308 our results uncover that this shift in activity purports a genuine reorganization of circuits  
309 processing sequence-specific information, similar to what was reported at the neuronal  
310 level in animals (Miyachi et al. 2002; Costa et al. 2004; Yin et al. 2009).

311 While our results show that the topology of the network representing motor sequential  
312 information differs between consolidated and newly acquired memory traces, the present  
313 study was not designed to investigate the information-content of hippocampal, striatal or  
314 cerebellar sequence representations. These were previously assessed at cortical level for  
315 finger sequences (Kornysheva and Diedrichsen 2014; Wiestler et al. 2014) as well as for  
316 larger forearm movements (Haar et al. 2017). However, the hypothesized extrinsic and  
317 intrinsic skill encoding in the respective hippocampal and striatal systems (Albouy et al.  
318 2013a) remains to be assessed with a dedicated experimental design similar to that used  
319 by Wiestler et al. (2014) to investigate such representations at the cortical level.

320 Importantly, our study investigated the change in neural substrates of sequence repre-  
321 sentation after limited training and following sleep-dependent consolidation. This is in  
322 contrast to previous investigations that studied sequences trained intensively for multiple  
323 days (Nambu et al. 2015) and compared their discriminability to that of newly acquired  
324 ones (Wiestler and Diedrichsen 2013). Therefore, in our study, the engagement of these  
325 representations for expressing the sequential skill may further evolve, strengthen or  
326 decline locally with either additional training or offline memory reprocessing supported  
327 in part by sleep.

## 328 **Methodological considerations**

329 To limit the level of difficulty and the duration of the task, only four sequences were  
330 performed by participants, two consolidated and two newly acquired. This low number  
331 of sequence per condition could be a factor limiting the power of our analysis, as only  
332 a single multivariate distance is assessed for each of these conditions. Moreover, ini-  
333 tial training sessions of the consolidated sequences were each comprised of a single  
334 sequence performed in blocks longer than in the present task, designed for multivari-  
335 ate investigation. The current task, by requiring additional cognitive resources (such as  
336 instruction processing, retention in working memory, switching and inhibition of other se-  
337 quences), could have triggered some novel learning for the consolidated sequences. This  
338 seems unlikely however, as this was not reflected in performance changes throughout  
339 the task. The switching component could partly explain the pattern of results found here,  
340 as shifting between overlapping sets of motor commands has been shown to further  
341 implicate the dorsal striatum in collaboration with the prefrontal cortex (Monchi et al.  
342 2006).

343 Another potential limitation relates to the fact that the present representational analysis  
344 disregarded the behavioral performance. Nevertheless, the chained non-linear relations  
345 between behavior, neural activity and BOLD signal were recently established to have  
346 limited influence on the representational geometry extracted from Mahalanobis cross-  
347 validated distance in primary cortex, sampled across a wide range of speed of repeated  
348 finger-presses and visual stimulation (Arbuckle et al. 2018). Therefore, despite behavioral  
349 variability and potential ongoing evolution of the memory trace, we assumed that the  
350 previously encoded motor sequence engrams were nevertheless retrieved during this  
351 task as supported by the significant differences in activity pattern discriminability and the  
352 persistent behavioral advantage observed for the consolidated sequences.

353 Finally, our results also entail that it is possible to investigate learning-related representa-  
354 tional changes in a shorter time-frame and with less extended training than what was  
355 investigated before (Wiestler and Diedrichsen 2013; Nambu et al. 2015), including in  
356 subcortical regions where neuronal organization differs from that of the cortex. The  
357 use of a novel multivariate distance could have contributed to obtain these results by  
358 achieving increased sensitivity and statistical robustness (Walther et al. 2016).

## 359 **Conclusion**

360 Our study shows that the consolidation of sequential motor knowledge is supported  
361 by the reorganization of newly acquired representations within a distributed cerebral  
362 network. We uncover that following learning, local activity patterns tuned to represent  
363 sequential knowledge are enhanced not only in extended cortical areas, similarly to those  
364 shown after longer training (Wiestler and Diedrichsen 2013), but also in dorsolateral stri-  
365 atum, thalamus and cerebellar regions. Conversely, a smaller network showed a decrease  
366 of sequence specific patterned activation after consolidation, occurring specifically in  
367 dorsomedial striatum that supports cognitive processing during early-learning (Doyon et  
368 al. 2018) as well as in the hippocampus which carries explicit encoding of motor sequen-  
369 tial extrinsic representation (Albouy et al. 2013b; King et al. 2017) and play a significant

370 role in the offline reprocessing. Despite discrepancies with GLM-based activity changes  
371 observed previously, the results of our novel representational approach corroborate their  
372 interpretations that the differential plasticity changes in the latter regions subtend MS�  
373 consolidation (Albouy et al. 2015). Importantly, these results reveal for the first time in  
374 humans that such changes are determined by the local implementation of distributed  
375 neural coding of sequential information. Yet such consolidation-related representational  
376 changes need to be further investigated through exploration of the dynamic mechanism  
377 mediating this sleep-dependent mnemonic process, which is known to reorganize pro-  
378 gressively the cerebral network by repeatedly reactivating the memory trace (Fogel et al.  
379 2017; Vahdat et al. 2017; Boutin et al. 2018).

## 380 **Materials and methods**

### 381 **Participants**

382 Right-handed young ( $n = 34, 25 \pm 6.2\text{yr.}$ ) healthy individuals (19 females), recruited by  
383 advertising on academic and public website, participated in the study. Participants were  
384 excluded if they had a history of neurological psychological or psychiatric disorders,  
385 scored 4 and above on the short version of Beck Depression Scale (Beck et al. 1961), had  
386 a BMI greater than 27, smoked, had an extreme chronotype, were night-workers, had  
387 traveled across meridians during the three previous months, or were trained as musician  
388 or professional typist for more than a year. Their sleep quality was subjectively assessed,  
389 and individuals with score to the Pittsburgh Sleep Quality Index questionnaire (Buysse et  
390 al. 1989) greater or equal to 5, or daytime sleepiness Epworth Sleepiness Scale (Johns  
391 1991) score greater than 9, were excluded.

392 Participants included in the study were also instructed to abstain from caffeine, alcohol  
393 and nicotine, to maintain a regular sleep schedule (bed-time 10PM-1AM, wake-time 7AM-  
394 10AM) and avoid taking daytime nap for the duration of the experiment. In a separate  
395 screening session, EEG activity was also recorded while participants slept at night in a  
396 mock MRI scanner and gradients sounds were played to both screen for potential sleep  
397 disorders and test their ability to sleep in the experimental environment; 18 participants  
398 were excluded for not meeting the criterion of a minimum of 20min. in NREM2 sleep.  
399 After this last inclusion step, their sleep schedule was assessed by analyzing the data  
400 obtained from an actigraph (Actiwatch 2, Philips Respironics, Andover, MA, USA) worn on  
401 the wrist of the non-dominant hand for the week preceding as well as during the three  
402 days of experiment, hence certifying that all participants complied to the instructions.

403 Among the 34 participants, one did not show within-session improvement on the task,  
404 two didn't sleep on the first experimental night, three were withdrawn for technical  
405 problems, one did not show up on first experimental session, one presented novel MRI  
406 contraindication. Thus, among the 26 participants that completed the research project, a  
407 group of 18 which, by design, followed the appropriate behavioral intervention for the  
408 present study, were retained for our analysis.

409 All participants provided written informed consent and received financial compensation  
410 for their participation. This study protocol was approved by the Research Ethics Board

411 of the “Comité mixte d’éthique de la recherche - Regroupement en Neuroimagerie du  
412 Québec” (CMER-RNQ).

## 413 **Procedures and tasks**

414 The present study was conducted over 3 consecutive evenings and is part of an experi-  
415 ment that aimed to investigate the neural substrates mediating the consolidation and  
416 reconsolidation of motor sequence memories during wakefulness and sleep that will be  
417 reported separately. On each day, participants performed the experimental tasks while  
418 their brain activity was recorded using MRI. Their non-dominant hand (left) was placed on  
419 an ergonomic MRI-compatible response pad equipped with 4-keys corresponding to each  
420 of the fingers excluding the thumb.

421 On the first day (D1), participants were trained to perform repeatedly a 5-element se-  
422 quence (TSeq1: 1-4-2-3-1 where 1 indicate the little finger and 4 the index finger). The  
423 motor sequence was performed in blocks separated by rest periods to avoid fatigue.  
424 Apart for a green or a red cross displayed in the center of the screen, respectively in-  
425 structing the participants to execute the sequence or to rest, there were no other visual  
426 stimuli presented during the task. Participants were instructed to execute the sequence  
427 repeatedly, and as fast and accurately as possible, as long as the cross was green. They  
428 were then instructed to rest for the period of 25 sec. as indicated by the red cross. During  
429 each of the 14 practice blocks, participants performed repeatedly 12 motor sequences  
430 (i.e. 60 keypresses per block). In case participants made a mistake during sequence  
431 production, they were instructed to stop their performance and to immediately start  
432 practicing again from the beginning of the sequence until the end of the block. After  
433 completion of the training phase, participants were then administered a short retention  
434 test about 15min later, which consisted of a single block comprising 12 repetitions of  
435 the sequence. Then the participants were scanned with concurrent EEG and fMRI for  
436 approximately two hours while instructed to sleep.

437 On the second day (D2), participants were first evaluated on the TSeq1 (1 block retest) to  
438 test their level of consolidation of the motor sequence, and were then trained on a new  
439 sequence (TSeq2: 1-3-2-4-1) which was again performed for 14 blocks of 12 sequences  
440 each, similarly to TSeq1 training on D1. Again, they were then scanned during sleep while  
441 EEG recordings were simultaneously acquired.

442 Finally, on the third day (D3), participants first performed TSeq1 for 7 blocks followed by 7  
443 blocks of TSeq2, each block including 12 repetitions of the sequence or 60 keypresses.  
444 Following this last testing session, participants were then asked to complete an experi-  
445 mental task (here called MVPA task) specifically designed for the current study, similar  
446 to a previous study that investigated sequence representation by means of multivariate  
447 classification (Wiestler and Diedrichsen 2013). Specifically, participants performed short  
448 practice blocks of 4 different sequences, including TSeq1 and TSeq2 that were then con-  
449 solidated, as well as two new finger sequences (NewSeq1: 1-2-4-3-1, NewSeq2: 4-1-3-2-4).  
450 In contrast to Wiestler and Diedrichsen (2013), however, all four sequences used only  
451 four fingers of the left-hand, excluding the thumb. Also, as for the initial training, se-  
452 quences were instead repeated uninterruptedly and without feedback, in order to probe  
453 the processes underlying automatization of the skill.

454 Each block was composed of an instruction period of 4 seconds during which the se-  
455 quences to be performed was displayed as a series of 5 numbers (e.g. 1-4-2-3-1), that  
456 could easily be remembered by the participant. The latter was then followed by an execu-  
457 tion phase triggered by the appearance of a green cross. Participants performed 5 times  
458 the same sequence (or a maximum of 25 key-presses), before being instructed to stop  
459 and rest when the red cross was displayed.

460 The four sequences were assigned to blocks such as to include all possible successive  
461 pairs of the sequences using De-Bruijn cycles (Aguirre et al. 2011), thus preventing the  
462 systematic leakage of BOLD activity patterns between blocks in this rapid design. As  
463 a 2-length De-Bruijn cycle of the 4 sequences has to include each sequence 4 times,  
464 this yielded a total of 16 blocks. In our study, two different De-Bruijn cycles were each  
465 repeated twice in two separate scanning runs separated by approximately 5 minutes of  
466 rest, hence resulting in a total of 64 blocks (4 groups of 16 practice blocks for a total of 16  
467 blocks per sequence). The blocks were synchronized to begin at a fixed time during the  
468 TR of the fMRI acquisition.

### 469 **Behavioral statistics**

470 Using data from the MVPA-task, we entered the mean duration per block of correctly  
471 performed sequences into a linear mixed-effect model with a sequence learning stage  
472 (new/consolidated) by block (1-16) interaction to test for difference in their performance  
473 level, as well as the evolution during the task, with sequences and blocks as random  
474 effects and participants as the grouping factor. The same model was run with the number  
475 of correct sequences as the outcome variable. Two other models were also used on  
476 subsets of data to test separately if there was any significant difference in performance  
477 (speed and accuracy) between the two consolidated sequences and between the two new  
478 sequences. Full models outputs are reported in supplementary materials.

### 479 **MRI data acquisition**

480 MRI data were acquired on a Siemens TIM Trio 3T scanner with two different setups. The  
481 first used a 32-channel coil to acquire high-resolution anatomical T1 weighted sagittal  
482 images using a Multi-Echo MPRAGE sequence (MEMPRAGE; voxel size=1mm isometric;  
483 TR=2530ms; TE=1.64,3.6,5.36,7.22ms; FA=7; GRAPPA=2; FoV=256 × 256 × 176mm) with the  
484 different echoes combined using a Root-Mean-Square (RMS).

485 Functional data were acquired with a 12-channel coil, which allowed to fit an EEG cap to  
486 monitor sleep after training, and using an EPI sequence providing complete cortical and  
487 cerebellum coverage (40 axial slices, acquire in ascending order, TR=2160ms;FoV=220 ×  
488 220 × 132mm, voxel size=3.44 × 3.44 × 3.3mm, TE=30ms, FA=90, GRAPPA=2). Following task  
489 fMRI data acquisition, four volumes were acquired using the same EPI sequence but with  
490 reversed phase encoding to enable retrospective correction of distortions induced by B0  
491 field inhomogeneity.

## 492 **MRI data preprocessing**

493 High-resolution anatomical T1 weighted images were preprocessed with Freesurfer (Dale  
494 et al. 1999; Fischl et al. 1999, 2008) to segment subcortical regions, reconstruct cortical  
495 surfaces and provide inter-individual alignment of cortical folding patterns. Pial and  
496 grey/white matter interface surfaces were downsampled to match the 32k sampling of  
497 Human Connectome Project (HCP) (Glasser et al. 2013). HCP subcortical atlas coordinates  
498 were warped onto individual T1 data using non-linear registration with the Ants software  
499 (Avants et al. 2008; Klein et al. 2009).

500 A custom pipeline was then used to preprocess fMRI data prior to analysis and relied on  
501 an integrated method (Pinsard et al. 2018) which combines slice-wise motion estimation  
502 and intensity correction followed by the extraction of BOLD timecourses in cortical and  
503 subcortical gray matter. This interpolation concurrently removed B0 inhomogeneity  
504 induced EPI distortion estimated by the FSL Topup tool using the fMRI data with reversed  
505 phase encoding (Andersson et al. 2003) acquired after the task. BOLD signal was further  
506 processed by detecting whole-brain intensity changes that corresponded to large motion,  
507 and each continuous period without such detected event was then separately detrended  
508 to remove linear signal drifts.

509 Importantly, the fMRI data preprocessing did not include smoothing, even though the  
510 interpolation inherent to any motion correction was based on averaging of values of  
511 neighboring voxels. This approach was intended to minimize the blurring of data in order  
512 to preserve fine-grained patterns of activity, with the resolution of relevant patterns being  
513 hypothetically at the columnar scale.

## 514 **Multivariate Pattern Analysis**

### 515 **Samples**

516 Each block was modeled by two boxcars, corresponding to the instruction and execution  
517 phases respectively, convolved with the single-gamma Hemodynamic Response Func-  
518 tion. Least-square separate (LS-S) regression of each event, which have been shown to  
519 provide improved activation patterns estimates for MVPA (Mumford et al. 2012), yielded  
520 instruction and execution phases beta maps for each block that were further used as  
521 MVPA samples.

### 522 **Cross-validated multivariate distance**

523 Similarly to Wiestler and Diedrichsen (2013) and Nambu et al. (2015), we aimed to uncover  
524 activity patterns that represented the different sequences performed by the participants.  
525 However, instead of calculating cross-validated classification accuracies, we opted for a  
526 representational approach by computing multivariate distance between activity patterns  
527 evoked by the execution of sequences, in order to avoid ceiling effect and baseline drift  
528 sensitivity (Walther et al. 2016). In the current study, we computed the cross-validated  
529 Mahalanobis distance (Nili et al. 2014; Diedrichsen et al. 2016; Walther et al. 2016), which  
530 is an unbiased metric that uses multivariate normalization by estimating the covariance  
531 from the GLM fitting residuals and regularizing it through Ledoit-Wolf optimal shrinkage

532 (Ledoit and Wolf 2004). This distance, which measures discriminability of conditions, was  
533 estimated separately for pairs of sequences that were in a similar acquisition stage, that  
534 is, for the newly acquired and consolidated sequences.

### 535 Searchlight analysis

536 Searchlight (Kriegeskorte et al. 2006) is an exploratory technique that applies MVPA  
537 repeatedly on small spatial neighborhoods covering the whole brain while avoiding high-  
538 dimensional limitation of multivariate algorithms. Searchlight was configured to select  
539 for each gray-matter coordinate their 64 closest neighbors as the subset of features for  
540 representational distance estimation. The neighborhood was limited to coordinates in  
541 the same structure (hemisphere or region of interest), and proximity was determined  
542 using respectively Euclidian and geodesic distance for subcortical and cortical coordinates.  
543 The extent of the searchlight was thus kept to such a local range to limit the inflation of  
544 false positive or negative results (Etzel et al. 2012, 2013).

### 545 Statistical testing

546 To assess statistical significance of multivariate distance and contrasts, group-level Monte-  
547 Carlo non-parametric statistical testing using 10000 permutations was conducted on  
548 searchlight distance maps with Threshold-Free-Cluster-Enhancement (TFCE) correction  
549 (Smith and Nichols 2009). The statistical significance level was set at  $p < .05$  (with confi-  
550 dence interval  $\pm .0044$  for 10000 permutations) with a minimum cluster size of 10 features.  
551 TFCE enabled a locally adaptive statistics and cluster size correction that particularly fitted  
552 our BOLD sampling of sparse gray-matter coordinates, as well as the large differences in  
553 the sizes of the structures that were investigated.

554 The MVPA analysis was done using the PyMVPA software (Hanke et al. 2009) package with  
555 additional development of custom samples extraction, cross-validation scheme, efficient  
556 searchlight and multivariate measure computation, optimally adapted to the study design  
557 and the anatomy-constrained data sampling.

## 558 Acknowledgments

559 We thank J.Diedrichsen for methodological advice on our multivariate representational  
560 analysis.

## 561 Author contributions

- 562 • Conceptualization: BP, AB, EG, HB, JD
- 563 • Investigation: AB, EG, BP
- 564 • Analysis: BP
- 565 • Software development: BP
- 566 • Writing: BP
- 567 • Review and editing: BP, AB, EG, OL, HB, JD



## 568 **Funding**

569 This work was supported by the Canadian Institutes of Health Research (MOP 97830) to  
570 JD, as well as by French Education and Research Ministry and Sorbonne Universités to BP.

571 **Supplementary materials**

572 **Behavioral linear mixed-effect model outputs**

573 Test for differences in speed as mean duration to perform a correct se-  
574 quence per block

575

576 mean\_seq\_duration ~ seq\_new \* blocks + (blocks+sequences | participants)

```
577 =====
578 Model:                MixedLM                Dependent Variable:    mean_seq_duration
579 No. Observations:    1146                    Method:                REML
580 No. Groups:          18                      Scale:                 0.0368
581 Min. group size:     62                     Likelihood:            165.9658
582 Max. group size:     64                     Converged:              Yes
583 Mean group size:     63.7
584 -----
585                                     Coef.  Std.Err.  z    P>|z| [0.025 0.975]
586 -----
587 Intercept                1.269    0.076  16.790  0.000   1.121   1.417
588 seq_new[T.True]          0.365    0.047   7.776  0.000   0.273   0.457
589 blocks                   -0.006    0.005  -1.304  0.192  -0.016   0.003
590 seq_new[T.True]:blocks  -0.018    0.002  -7.403  0.000  -0.023  -0.013
591 Intercept RE              0.132    0.246
592 Intercept RE x sequences[T.NewSeq2] RE -0.004    0.051
593 sequences[T.NewSeq2] RE   0.007    0.021
594 Intercept RE x sequences[T.TSeq1] RE  -0.039    0.098
595 sequences[T.NewSeq2] RE x sequences[T.TSeq1] RE  0.001    0.024
596 sequences[T.TSeq1] RE    0.025    0.056
597 Intercept RE x sequences[T.Tseq2] RE  -0.038    0.092
598 sequences[T.NewSeq2] RE x sequences[T.Tseq2] RE  0.001    0.023
599 sequences[T.TSeq1] RE x sequences[T.Tseq2] RE  0.023    0.049
600 sequences[T.Tseq2] RE    0.022    0.048
601 Intercept RE x blocks RE  -0.005    0.010
602 sequences[T.NewSeq2] RE x blocks RE    0.000    0.002
603 sequences[T.TSeq1] RE x blocks RE    0.002    0.005
604 sequences[T.Tseq2] RE x blocks RE    0.002    0.004
605 blocks RE                 0.000    0.001
606 =====
```

607 Test for differences in accuracy as the number of correct sequences over  
 608 the 5 repetitions in a block

609

610 num\_correct\_seq ~ seq\_new \* blocks + (blocks+sequences | participants)

```

611 =====
612 Model:                    MixedLM           Dependent Variable:   num_correct_seq
613 No. Observations:        1152             Method:              REML
614 No. Groups:              18               Scale:               0.6018
615 Min. group size:         64               Likelihood:          -1409.7169
616 Max. group size:         64               Converged:           No
617 Mean group size:         64.0
618 -----
619                               Coef.  Std.Err.  z    P>|z| [0.025 0.975]
620 -----
621 Intercept                    4.691   0.079  59.215 0.000  4.536  4.846
622 seq_new[T.True]              -0.304  0.101  -3.003 0.003  -0.503 -0.106
623 blocks                       -0.006  0.057  -0.101 0.919  -0.117  0.106
624 seq_new[T.True]:blocks        0.014  0.010  1.434 0.152  -0.005  0.034
625 Intercept RE                  0.002   0.021
626 Intercept RE x sequences[T.NewSeq2] RE -0.003  0.019
627 sequences[T.NewSeq2] RE       0.016  0.028
628 Intercept RE x sequences[T.TSeq1] RE  -0.005  0.022
629 sequences[T.NewSeq2] RE x sequences[T.TSeq1] RE 0.019  0.032
630 sequences[T.TSeq1] RE        0.026  0.047
631 Intercept RE x sequences[T.Tseq2] RE  -0.004  0.025
632 sequences[T.NewSeq2] RE x sequences[T.Tseq2] RE 0.017  0.042
633 sequences[T.TSeq1] RE x sequences[T.Tseq2] RE 0.027  0.058
634 sequences[T.Tseq2] RE        0.034  0.089
635 Intercept RE x blocks RE     -0.001  0.021
636 sequences[T.NewSeq2] RE x blocks RE  0.001  0.016
637 sequences[T.TSeq1] RE x blocks RE  0.002  0.018
638 sequences[T.Tseq2] RE x blocks RE  0.002
639 blocks RE                     0.038
640 =====
    
```

641 Test for differences in speed and accuracy between the new sequences

642

```
643 mean_seq_duration ~ sequences*blocks + (1|participants)
644 =====
645 Model:                MixedLM   Dependent Variable:  mean_seq_duration
646 No. Observations:    571       Method:                REML
647 No. Groups:          18        Scale:                 0.0655
648 Min. group size:     30        Likelihood:           -76.5056
649 Max. group size:     32        Converged:            Yes
650 Mean group size:     31.7
```

```
651 -----
652                               Coef.  Std.Err.  z    P>|z|  [0.025 0.975]
653 -----
654 Intercept                  1.630    0.071  22.931  0.000  1.490  1.769
655 sequences[T.NewSeq2]      0.025    0.045   0.558  0.577 -0.063  0.113
656 blocks                    -0.023    0.003 -7.157  0.000 -0.030 -0.017
657 sequences[T.NewSeq2]:blocks -0.005    0.005 -1.174  0.241 -0.015  0.004
658 groups RE                   0.073    0.102
```

659 =====

660

```
661 num_correct_seq ~ sequences*blocks + (1|participants)
662 =====
663 Model:                MixedLM   Dependent Variable:  num_correct_seq
664 No. Observations:    571       Method:                REML
665 No. Groups:          18        Scale:                 0.6209
666 Min. group size:     30        Likelihood:           -689.3501
667 Max. group size:     32        Converged:            Yes
668 Mean group size:     31.7
```

```
669 -----
670                               Coef.  Std.Err.  z    P>|z|  [0.025 0.975]
671 -----
672 Intercept                  4.553    0.102  44.450  0.000  4.353  4.754
673 sequences[T.NewSeq2]     -0.245    0.138 -1.772  0.076 -0.517  0.026
674 blocks                    -0.007    0.010 -0.728  0.467 -0.027  0.012
675 sequences[T.NewSeq2]:blocks 0.028    0.014  1.936  0.053 -0.000  0.056
676 groups RE                   0.018    0.017
```

677 =====

678 Test for differences in speed and accuracy between the consolidated se-  
679 quences

680

```
681 mean_seq_duration ~ sequences*blocks + (1|participants)
682 =====
683 Model:                MixedLM   Dependent Variable:  mean_seq_duration
684 No. Observations:    575       Method:                REML
685 No. Groups:          18       Scale:                 0.0222
686 Min. group size:     31       Likelihood:           226.1710
687 Max. group size:     32       Converged:            Yes
688 Mean group size:     31.9
689 -----
690                Coef.  Std.Err.  z    P>|z| [0.025 0.975]
691 -----
692 Intercept                1.256    0.057 21.949 0.000  1.144  1.368
693 sequences[T.TSeq2]       0.031    0.026  1.191 0.234 -0.020  0.082
694 blocks                   -0.008    0.002 -4.023 0.000 -0.011 -0.004
695 sequences[T.TSeq2]:blocks -0.000    0.003 -0.165 0.869 -0.006  0.005
696 groups RE                 0.053    0.125
697 =====
698
699 num_correct_seq ~ sequences*blocks + (1|participants)
700 =====
701 Model:                MixedLM   Dependent Variable:  num_correct_seq
702 No. Observations:    575       Method:                REML
703 No. Groups:          18       Scale:                 0.4050
704 Min. group size:     31       Likelihood:           -569.8356
705 Max. group size:     32       Converged:            Yes
706 Mean group size:     31.9
707 -----
708                Coef.  Std.Err.  z    P>|z| [0.025 0.975]
709 -----
710 Intercept                4.694    0.081 58.093 0.000  4.535  4.852
711 sequences[T.TSeq2]      -0.030    0.111 -0.267 0.789 -0.248  0.188
712 blocks                   -0.012    0.008 -1.414 0.157 -0.028  0.004
713 sequences[T.TSeq2]:blocks 0.014    0.012  1.207 0.228 -0.009  0.036
714 groups RE                 0.006    0.010
715 =====
```

716 **Representational distance maps**

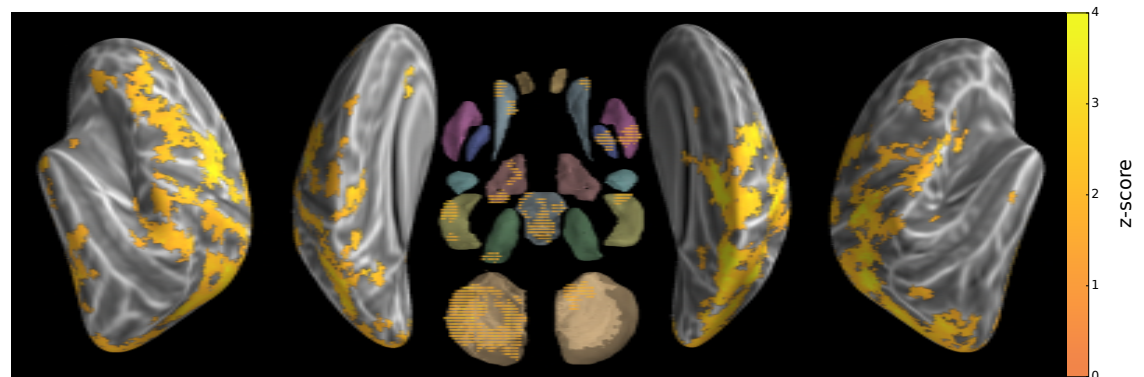

**Figure S1.** Group searchlight map of cross-validated Mahalanobis distance between the two new sequences (z-score thresholded at  $p < .05$  TFCE-cluster-corrected)

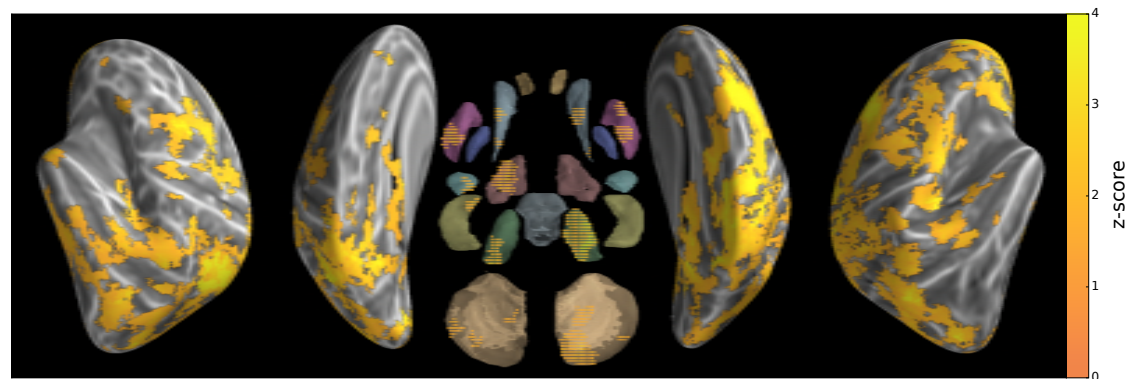

**Figure S2.** Group searchlight map of cross-validated Mahalanobis distance between the two consolidated sequences (z-score thresholded at  $p < .05$  TFCE-cluster-corrected)

717 **References**

- 718 Abrahamse E, Ruitenberg M, De Kleine E, Verwey WB. Control of automated behavior: Insights from the  
719 discrete sequence production task. *Front Hum Neurosci* [Internet]. 2013 [cited 2017 Nov 24];7. Available from:  
720 <https://www.frontiersin.org/articles/10.3389/fnhum.2013.00082/full>
- 721 Aguirre GK, Mattar MG, Magis-Weinberg L. De bruijn cycles for neural decoding. *NeuroImage* [Internet]. 2011  
722 Jun 1 [cited 2015 Jun 7];56(3):1293–300. Available from: <http://www.sciencedirect.com/science/article/pii/S1053811911001431>  
723
- 724 Albouy G, Fogel S, King BR, Laventure S, Benali H, Karni A, et al. Maintaining vs. enhancing motor sequence  
725 memories: Respective roles of striatal and hippocampal systems. *NeuroImage* [Internet]. 2015 Mar [cited 2015  
726 Jun 8];108:423–34. Available from: <http://www.sciencedirect.com/science/article/pii/S1053811914010416>
- 727 Albouy G, Fogel S, Pottiez H, Nguyen VA, Ray L, Lungu O, et al. Daytime sleep enhances consolidation of the  
728 spatial but not motoric representation of motor sequence memory. *PLoS ONE* [Internet]. 2013a Jan 2 [cited  
729 2015 Jun 8];8(1):e52805. Available from: <http://dx.doi.org/10.1371/journal.pone.0052805>
- 730 Albouy G, King BR, Maquet P, Doyon J. Hippocampus and striatum: Dynamics and interaction during acquisition  
731 and sleep-related motor sequence memory consolidation. *Hippocampus* [Internet]. 2013b [cited 2014 Dec

- 732 14];23(11):985–1004. Available from: <http://onlinelibrary.wiley.com/doi/10.1002/hipo.22183/abstract>
- 733 Albouy G, Sterpenich V, Vandewalle G, Darsaud A, Gais S, Rauchs G, et al. Interaction between hippocampal and  
734 striatal systems predicts subsequent consolidation of motor sequence memory. PLOS ONE [Internet]. 2013c  
735 Mar 22 [cited 2018 Jan 31];8(3):e59490. Available from: [http://journals.plos.org/plosone/article?id=10.1371/](http://journals.plos.org/plosone/article?id=10.1371/journal.pone.0059490)  
736 [journal.pone.0059490](http://journals.plos.org/plosone/article?id=10.1371/journal.pone.0059490)
- 737 Allefeld C, Gørgen K, Haynes J-D. Valid population inference for information-based imaging: Information  
738 prevalence inference. arXiv:151200810 [q-bio, stat] [Internet]. 2015 Dec 2 [cited 2016 Apr 22]; Available from:  
739 <http://arxiv.org/abs/1512.00810>
- 740 Andersson JLR, Skare S, Ashburner J. How to correct susceptibility distortions in spin-echo echo-planar images:  
741 Application to diffusion tensor imaging. NeuroImage [Internet]. 2003 Oct [cited 2016 Nov 8];20(2):870–88.  
742 Available from: <http://www.sciencedirect.com/science/article/pii/S1053811903003367>
- 743 Arbuckle SA, Yokoi A, Pruszynski JA, Diedrichsen J. Stability of representational geometry across a wide range  
744 of fMRI activity levels. bioRxiv [Internet]. 2018 Feb 16 [cited 2018 Feb 16];266585. Available from: [https://](https://www.biorxiv.org/content/early/2018/02/16/266585)  
745 [www.biorxiv.org/content/early/2018/02/16/266585](https://www.biorxiv.org/content/early/2018/02/16/266585)
- 746 Avants BB, Epstein CL, Grossman M, Gee JC. Symmetric diffeomorphic image registration with cross-correlation:  
747 Evaluating automated labeling of elderly and neurodegenerative brain. Medical Image Analysis [Internet].  
748 2008 Feb [cited 2015 Oct 30];12(1):26–41. Available from: [http://www.sciencedirect.com/science/article/pii/](http://www.sciencedirect.com/science/article/pii/S1361841507000606)  
749 [S1361841507000606](http://www.sciencedirect.com/science/article/pii/S1361841507000606)
- 750 Bassett DS, Yang M, Wymbs NF, Grafton ST. Learning-induced autonomy of sensorimotor systems. Nature  
751 Neuroscience [Internet]. 2015 [cited 2015 Apr 8]; Available from: [http://www.nature.com/neuro/journal/vaop/](http://www.nature.com/neuro/journal/vaop/ncurrent/full/nn.3993.html)  
752 [ncurrent/full/nn.3993.html](http://www.nature.com/neuro/journal/vaop/ncurrent/full/nn.3993.html)
- 753 Beck AT, Ward CH, Mendelson M, Mock J, Erbaugh J. An inventory for measuring depression. Arch Gen Psychiatry.  
754 1961 Jun;4:561–71.
- 755 Berlot E, Popp NJ, Diedrichsen J. In search of the engram, 2017. Current Opinion in Behavioral Sciences [Internet].  
756 2018 Apr 1 [cited 2017 Nov 29];20(Supplement C):56–60. Available from: [http://www.sciencedirect.com/science/](http://www.sciencedirect.com/science/article/pii/S2352154617301353)  
757 [article/pii/S2352154617301353](http://www.sciencedirect.com/science/article/pii/S2352154617301353)
- 758 Beukema P, Diedrichsen J, Verstynen T. Binding during sequence learning does not alter cortical representations  
759 of individual actions. bioRxiv [Internet]. 2018 Jan 30 [cited 2018 Jan 30];255794. Available from: [https://](https://www.biorxiv.org/content/early/2018/01/30/255794)  
760 [www.biorxiv.org/content/early/2018/01/30/255794](https://www.biorxiv.org/content/early/2018/01/30/255794)
- 761 Bollu T, Whitehead SC, Prasad N, Walker JR, Shyamkumar N, Subramaniam R, et al. Cortical control of kinematic  
762 primitives in mice performing a hold-still-center-out reach task. bioRxiv [Internet]. 2018 Apr 21 [cited 2018 Apr  
763 23];304907. Available from: <https://www.biorxiv.org/content/early/2018/04/21/304907>
- 764 Born J, Wilhelm I. System consolidation of memory during sleep. Psychological Research [Internet]. 2012 Mar 1  
765 [cited 2013 May 22];76(2):192–203. Available from: <http://link.springer.com/article/10.1007/s00426-011-0335-6>
- 766 Boutin A, Pinsard B, Boré A, Carrier J, Fogel SM, Doyon J. Transient synchronization of hippocampo-striato-  
767 thalamo-cortical networks during sleep spindle oscillations induces motor memory consolidation. NeuroImage  
768 [Internet]. 2018 Apr 1 [cited 2018 Feb 12];169:419–30. Available from: [http://www.sciencedirect.com/science/](http://www.sciencedirect.com/science/article/pii/S105381191731090X)  
769 [article/pii/S105381191731090X](http://www.sciencedirect.com/science/article/pii/S105381191731090X)
- 770 Brawn TP, Fenn KM, Nusbaum HC, Margoliash D. Consolidating the effects of waking and sleep on motor-  
771 sequence learning. J Neurosci [Internet]. 2010 Oct 20 [cited 2017 Nov 24];30(42):13977–82. Available from:  
772 <https://www.ncbi.nlm.nih.gov/pmc/articles/PMC2978076/>
- 773 Buysse DJ, Reynolds III CF, Monk TH, Berman SR, Kupfer DJ. The pittsburgh sleep quality index: A new instrument  
774 for psychiatric practice and research. Psychiatry Research [Internet]. 1989 May [cited 2015 Nov 4];28(2):193–213.  
775 Available from: <http://www.sciencedirect.com/science/article/pii/0165178189900474>
- 776 Combrisson E, Jerbi K. Exceeding chance level by chance: The caveat of theoretical chance levels in brain signal  
777 classification and statistical assessment of decoding accuracy. Journal of Neuroscience Methods [Internet].

- 778 2015 Jul 30 [cited 2018 Feb 27];250:126–36. Available from: <http://www.sciencedirect.com/science/article/pii/S0165027015000114>  
779
- 780 Corbit VL, Ahmari SE, Gittis AH. A corticostriatal balancing act supports skill learning. *Neuron* [Internet].  
781 2017 Oct 11 [cited 2017 Oct 11];96(2):253–5. Available from: <http://www.sciencedirect.com/science/article/pii/S0896627317309157>  
782
- 783 Costa RM, Cohen D, Nicoletis MAL. Differential corticostriatal plasticity during fast and slow motor skill learning  
784 in mice. *Current Biology* [Internet]. 2004 Jul 13 [cited 2016 Feb 18];14(13):1124–34. Available from: <http://www.sciencedirect.com/science/article/pii/S0960982204004658>  
785
- 786 Dale AM, Fischl B, Sereno MI. Cortical surface-based analysis: I. segmentation and surface reconstruction.  
787 *NeuroImage* [Internet]. 1999 Feb [cited 2015 Dec 9];9(2):179–94. Available from: <http://www.sciencedirect.com/science/article/pii/S1053811998903950>  
788
- 789 Davachi L, DuBrow S. How the hippocampus preserves order: The role of prediction and context. *Trends in*  
790 *Cognitive Sciences* [Internet]. 2015 Feb 1 [cited 2018 Apr 6];19(2):92–9. Available from: <http://www.sciencedirect.com/science/article/pii/S1364661314002563>  
791
- 792 Dayan E, Cohen LG. Neuroplasticity subserving motor skill learning. *Neuron* [Internet]. 2011 Nov 3 [cited 2015  
793 Oct 29];72(3):443–54. Available from: <http://www.sciencedirect.com/science/article/pii/S0896627311009184>
- 794 Debas K, Carrier J, Barakat M, Marrelec G, Bellec P, Tahar AH, et al. Off-line consolidation of motor sequence  
795 learning results in greater integration within a cortico-striatal functional network. *NeuroImage* [Internet].  
796 2014 Oct 1 [cited 2016 Apr 21];99:50–8. Available from: <http://www.sciencedirect.com/science/article/pii/S1053811914003875>  
797
- 798 Debas K, Carrier J, Orban P, Barakat M, Lungu O, Vandewalle G, et al. Brain plasticity related to the consolidation of  
799 motor sequence learning and motor adaptation. *PNAS* [Internet]. 2010 Oct 12 [cited 2016 Jan 19];107(41):17839–  
800 44. Available from: <http://www.pnas.org/content/107/41/17839>
- 801 Diedrichsen J, Kornysheva K. Motor skill learning between selection and execution. *Trends in Cognitive Sciences*  
802 [Internet]. 2015 Apr [cited 2016 Feb 18];19(4):227–33. Available from: <http://www.sciencedirect.com/science/article/pii/S1364661315000273>  
803
- 804 Diedrichsen J, Provost S, Zareamoghaddam H. On the distribution of cross-validated mahalanobis distances.  
805 *arXiv:160701371 [stat]* [Internet]. 2016 Jul 5 [cited 2018 Feb 12]; Available from: <http://arxiv.org/abs/1607.01371>
- 806 Doyon J, Bellec P, Amsel R, Penhune V, Monchi O, Carrier J, et al. Contributions of the basal ganglia and functionally  
807 related brain structures to motor learning. *Behavioural Brain Research* [Internet]. 2009a Apr 12 [cited 2016 Jan  
808 7];199(1):61–75. Available from: <http://www.sciencedirect.com/science/article/pii/S0166432808006281>
- 809 Doyon J, Benali H. Reorganization and plasticity in the adult brain during learning of motor skills. *Current Opinion*  
810 *in Neurobiology* [Internet]. 2005 Apr [cited 2015 Jun 8];15(2):161–7. Available from: <http://www.sciencedirect.com/science/article/pii/S095943880500036X>  
811
- 812 Doyon J, Gabbitov E, Vahdat S, Lungu O, Boutin A. Current issues related to motor sequence learning in humans.  
813 *Current Opinion in Behavioral Sciences* [Internet]. 2018 Apr [cited 2017 Nov 29];20:89–97. Available from:  
814 <https://www.sciencedirect.com/science/article/pii/S2352154617301213>
- 815 Doyon J, Korman M, Morin A, Dostie V, Tahar AH, Benali H, et al. Contribution of night and day sleep vs. simple  
816 passage of time to the consolidation of motor sequence and visuomotor adaptation learning. *Exp Brain Res*  
817 [Internet]. 2009b May 1 [cited 2018 Apr 5];195(1):15–26. Available from: <https://link.springer.com/article/10.1007/s00221-009-1748-y>  
818
- 819 Doyon J, Song AW, Karni A, Lalonde F, Adams MM, Ungerleider LG. Experience-dependent changes in cerebellar  
820 contributions to motor sequence learning. *PNAS* [Internet]. 2002 Jan 22 [cited 2016 Mar 10];99(2):1017–22.  
821 Available from: <http://www.pnas.org/content/99/2/1017>
- 822 Dudai Y, Karni A, Born J. The consolidation and transformation of memory. *Neuron* [Internet]. 2015 Oct 7 [cited  
823 2015 Nov 2];88(1):20–32. Available from: <http://www.sciencedirect.com/science/article/pii/S0896627315007618>
- 824 Ejaz N, Hamada M, Diedrichsen J. Hand use predicts the structure of representations in sensorimotor cortex.  
825 *Nat Neurosci* [Internet]. 2015 Jul [cited 2015 Oct 30];18(7):1034–40. Available from: <http://www.nature.com/>



- 826 [neurojournal/v18/n7/full/nn.4038.html](http://neurojournal/v18/n7/full/nn.4038.html)
- 827 Etzel JA, Cole MW, Braver TS. Looking outside the searchlight. In: Langs G, Rish I, Grosse-Wentrup M, Murphy B,  
828 editors. Machine learning and interpretation in neuroimaging [Internet]. Springer Berlin Heidelberg; 2012 [cited  
829 2015 Nov 5]. pp. 26–33. Available from: [http://link.springer.com/chapter/10.1007/978-3-642-34713-9\\_4](http://link.springer.com/chapter/10.1007/978-3-642-34713-9_4)
- 830 Etzel JA, Zacks JM, Braver TS. Searchlight analysis: Promise, pitfalls, and potential. *NeuroImage* [Internet].  
831 2013 Sep [cited 2015 Nov 3];78:261–9. Available from: <http://www.sciencedirect.com/science/article/pii/S1053811913002917>  
832
- 833 Fischer S, Hallschmid M, Elsner AL, Born J. Sleep forms memory for finger skills. *PNAS* [Internet]. 2002 Sep 3  
834 [cited 2018 Feb 26];99(18):11987–91. Available from: <http://www.pnas.org/content/99/18/11987>
- 835 Fischl B, Rajendran N, Busa E, Augustinack J, Hinds O, Yeo BTT, et al. Cortical folding patterns and predicting  
836 cytoarchitecture. *Cereb Cortex* [Internet]. 2008 Aug 1 [cited 2015 Dec 9];18(8):1973–80. Available from:  
837 <http://cercor.oxfordjournals.org/content/18/8/1973>
- 838 Fischl B, Sereno MI, Tootell RB, Dale AM. High-resolution intersubject averaging and a coordinate system for the  
839 cortical surface. *Hum Brain Mapp*. 1999;8(4):272–84.
- 840 Fogel S, Albouy G, King BR, Lungu O, Vien C, Bore A, et al. Reactivation or transformation? Motor memory  
841 consolidation associated with cerebral activation time-locked to sleep spindles. *PLOS ONE* [Internet]. 2017 Apr  
842 19 [cited 2017 May 17];12(4):e0174755. Available from: [http://journals.plos.org/plosone/article?id=10.1371/  
843 journal.pone.0174755](http://journals.plos.org/plosone/article?id=10.1371/journal.pone.0174755)
- 844 François-Brosseau F-E, Martinu K, Strafella AP, Petrides M, Simard F, Monchi O. Basal ganglia and frontal  
845 involvement in self-generated and externally-triggered finger movements in the dominant and non-dominant  
846 hand. *European Journal of Neuroscience* [Internet]. 2009 Mar 1 [cited 2018 Feb 16];29(6):1277–86. Available  
847 from: <http://onlinelibrary.wiley.com/doi/10.1111/j.1460-9568.2009.06671.x/abstract>
- 848 Glasser MF, Sotiropoulos SN, Wilson JA, Coalson TS, Fischl B, Andersson JL, et al. The minimal preprocessing  
849 pipelines for the human connectome project. *NeuroImage* [Internet]. 2013 Oct 15 [cited 2014 Feb 27];80:105–24.  
850 Available from: <http://www.sciencedirect.com/science/article/pii/S1053811913005053>
- 851 Haar S, Dinstein I, Shelef I, Donchin O. Effector-invariant movement encoding in the human motor system. *J*  
852 *Neurosci* [Internet]. 2017 Sep 13 [cited 2017 Sep 14];37(37):9054–63. Available from: [http://www.jneurosci.org/  
853 content/37/37/9054](http://www.jneurosci.org/content/37/37/9054)
- 854 Haber SN, Calzavara R. The cortico-basal ganglia integrative network: The role of the thalamus. *Brain Research*  
855 *Bulletin* [Internet]. 2009 Feb 16 [cited 2018 Mar 21];78(2):69–74. Available from: [http://www.sciencedirect.com/  
856 science/article/pii/S0361923008003420](http://www.sciencedirect.com/science/article/pii/S0361923008003420)
- 857 Hanke M, Halchenko YO, Sederberg PB, Olivetti E, Fründ I, Rieger JW, et al. PyMVPA : A unifying approach to  
858 the analysis of neuroscientific data. *Front Neuroinform* [Internet]. 2009 [cited 2014 Mar 6];3:3. Available from:  
859 <http://journal.frontiersin.org/Journal/10.3389/neuro.11.003.2009/full>
- 860 Hardwick RM, Rottschy C, Miall RC, Eickhoff SB. A quantitative meta-analysis and review of motor learning  
861 in the human brain. *NeuroImage* [Internet]. 2013 Feb 15 [cited 2016 Feb 16];67:283–97. Available from:  
862 <http://www.sciencedirect.com/science/article/pii/S1053811912011329>
- 863 Hebart MN, Baker CI. Deconstructing multivariate decoding for the study of brain function. *NeuroImage*  
864 [Internet]. 2017 Aug 4 [cited 2018 Feb 27]; Available from: [http://www.sciencedirect.com/science/article/pii/  
865 S1053811917306523](http://www.sciencedirect.com/science/article/pii/S1053811917306523)
- 866 Jamalabadi H, Alizadeh S, Schönauer M, Leibold C, Gais S. Classification based hypothesis testing in neuroscience:  
867 Below-chance level classification rates and overlooked statistical properties of linear parametric classifiers. *Hum*  
868 *Brain Mapp* [Internet]. 2016 May 1 [cited 2016 Jun 20];37(5):1842–55. Available from: [http://onlinelibrary.wiley.  
869 com/doi/10.1002/hbm.23140/abstract](http://onlinelibrary.wiley.com/doi/10.1002/hbm.23140/abstract)
- 870 Jankowski J, Scheef L, Hüppe C, Boecker H. Distinct striatal regions for planning and executing novel and  
871 automated movement sequences. *NeuroImage* [Internet]. 2009 Feb 15 [cited 2018 Feb 6];44(4):1369–79.  
872 Available from: <http://www.sciencedirect.com/science/article/pii/S1053811908011592>
- 873 Johns MW. A new method for measuring daytime sleepiness: The epworth sleepiness scale. *Sleep*. 1991

- 874 Dec;14(6):540–5.
- 875 Karni A, Meyer G, Rey-Hipolito C, Jezzard P, Adams MM, Turner R, et al. The acquisition of skilled motor  
876 performance: Fast and slow experience-driven changes in primary motor cortex. PNAS [Internet]. 1998 Feb 3  
877 [cited 2018 Mar 25];95(3):861–8. Available from: <http://www.pnas.org/content/95/3/861>
- 878 Kawai R, Markman T, Poddar R, Ko R, Fantana AL, Dhawale AK, et al. Motor cortex is required for learning but  
879 not for executing a motor skill. Neuron [Internet]. 2015 May 6 [cited 2017 Nov 21];86(3):800–12. Available from:  
880 <http://www.sciencedirect.com/science/article/pii/S0896627315002202>
- 881 King BR, Hoedlmoser K, Hirschauer F, Dolfen N, Albouy G. Sleeping on the motor engram: The multifaceted  
882 nature of sleep-related motor memory consolidation. Neuroscience & Biobehavioral Reviews [Internet]. 2017  
883 Sep 1 [cited 2017 Nov 24];80(Supplement C):1–22. Available from: <http://www.sciencedirect.com/science/article/pii/S0149763416306315>
- 885 Klein A, Andersson J, Ardekani BA, Ashburner J, Avants B, Chiang M-C, et al. Evaluation of 14 nonlinear defor-  
886 mation algorithms applied to human brain MRI registration. NeuroImage [Internet]. 2009 Jul 1 [cited 2015 Oct  
887 30];46(3):786–802. Available from: <http://www.sciencedirect.com/science/article/pii/S1053811908012974>
- 888 Korman M, Raz N, Flash T, Karni A. Multiple shifts in the representation of a motor sequence during the  
889 acquisition of skilled performance. PNAS [Internet]. 2003 Oct 14 [cited 2015 Nov 2];100(21):12492–7. Available  
890 from: <http://www.pnas.org/content/100/21/12492>
- 891 Kornysheva K, Diedrichsen J. Human premotor areas parse sequences into their spatial and temporal features.  
892 eLife Sciences [Internet]. 2014 Aug 12 [cited 2015 Apr 17];3:e03043. Available from: <http://elifesciences.org/content/3/e03043>
- 894 Kriegeskorte N, Goebel R, Bandettini P. Information-based functional brain mapping. PNAS [Internet]. 2006 Mar  
895 7 [cited 2014 Feb 27];103(10):3863–8. Available from: <http://www.pnas.org/content/103/10/3863>
- 896 Kupferschmidt DA, Juczewski K, Cui G, Johnson KA, Lovinger DM. Parallel, but dissociable, processing in discrete  
897 corticostriatal inputs encodes skill learning. Neuron [Internet]. 2017 Oct 11 [cited 2017 Oct 11];96(2):476–489.e5.  
898 Available from: <http://www.sciencedirect.com/science/article/pii/S0896627317309091>
- 899 Landry S, Anderson C, Conduit R. The effects of sleep, wake activity and time-on-task on offline motor sequence  
900 learning. Neurobiology of Learning and Memory [Internet]. 2016 Jan [cited 2015 Dec 23];127:56–63. Available  
901 from: <http://www.sciencedirect.com/science/article/pii/S107474271500218X>
- 902 Ledoit O, Wolf M. Honey, i shrunk the sample covariance matrix. The Journal of Portfolio Management [Internet].  
903 2004 Jul 31 [cited 2018 Feb 9];30(4):110–9. Available from: <http://jpm.ijournals.com/content/30/4/110>
- 904 Lehérycy S, Benali H, Moortele P-FV de, Pélégrini-Issac M, Waechter T, Ugurbil K, et al. Distinct basal ganglia  
905 territories are engaged in early and advanced motor sequence learning. PNAS [Internet]. 2005 Aug 30 [cited  
906 2015 Jun 8];102(35):12566–71. Available from: <http://www.pnas.org/content/102/35/12566>
- 907 Makino H, Ren C, Liu H, Kim AN, Kondapaneni N, Liu X, et al. Transformation of cortex-wide emergent properties  
908 during motor learning. Neuron [Internet]. 2017 May 17 [cited 2018 Feb 6];94(4):880–890.e8. Available from:  
909 <http://www.sciencedirect.com/science/article/pii/S0896627317303410>
- 910 Miyachi S, Hikosaka O, Lu X. Differential activation of monkey striatal neurons in the early and late stages of  
911 procedural learning. Exp Brain Res [Internet]. 2002 Jul 26 [cited 2016 Apr 22];146(1):122–6. Available from:  
912 <http://link.springer.com/article/10.1007/s00221-002-1213-7>
- 913 Miyawaki Y, Uchida H, Yamashita O, Sato M-a, Morito Y, Tanabe HC, et al. Visual image reconstruction from human  
914 brain activity using a combination of multiscale local image decoders. Neuron [Internet]. 2008 Dec 10 [cited 2018  
915 Feb 19];60(5):915–29. Available from: <http://www.sciencedirect.com/science/article/pii/S0896627308009586>
- 916 Monchi O, Petrides M, Strafella AP, Worsley KJ, Doyon J. Functional role of the basal ganglia in the planning  
917 and execution of actions. Ann Neurol [Internet]. 2006 Feb 1 [cited 2018 Feb 16];59(2):257–64. Available from:  
918 <http://onlinelibrary.wiley.com/doi/10.1002/ana.20742/abstract>
- 919 Mumford JA, Turner BO, Ashby FG, Poldrack RA. Deconvolving BOLD activation in event-related designs for  
920 multivoxel pattern classification analyses. NeuroImage [Internet]. 2012 Feb 1 [cited 2015 Nov 30];59(3):2636–43.

- 921 Available from: <http://www.sciencedirect.com/science/article/pii/S1053811911010081>
- 922 Nambu I, Hagura N, Hirose S, Wada Y, Kawato M, Naito E. Decoding sequential finger movements from  
923 preparatory activity in higher-order motor regions: A functional magnetic resonance imaging multi-voxel  
924 pattern analysis. *Eur J Neurosci* [Internet]. 2015 Nov 1 [cited 2016 Mar 4];42(10):2851–9. Available from:  
925 <http://onlinelibrary.wiley.com/doi/10.1111/ejn.13063/abstract>
- 926 Nettersheim A, Hallschmid M, Born J, Diekelmann S. The role of sleep in motor sequence consolidation:  
927 Stabilization rather than enhancement. *J Neurosci* [Internet]. 2015 Apr 29 [cited 2015 May 1];35(17):6696–702.  
928 Available from: <http://www.jneurosci.org/content/35/17/6696>
- 929 Nili H, Wingfield C, Walther A, Su L, Marslen-Wilson W, Kriegeskorte N. A toolbox for representational similarity  
930 analysis. *PLOS Computational Biology* [Internet]. 2014 Apr 17 [cited 2018 Feb 12];10(4):e1003553. Available  
931 from: <http://journals.plos.org/ploscompbiol/article?id=10.1371/journal.pcbi.1003553>
- 932 Omrani M, Kaufman MT, Hatsopoulos NG, Cheney PD. Perspectives on classical controversies about the motor  
933 cortex. *Journal of Neurophysiology* [Internet]. 2017 Jun 14 [cited 2018 Apr 23];118(3):1828–48. Available from:  
934 <https://www.physiology.org/doi/abs/10.1152/jn.00795.2016>
- 935 Orban P, Peigneux P, Lungu O, Albouy G, Breton E, Laberenne F, et al. The multifaceted nature of the relation-  
936 ship between performance and brain activity in motor sequence learning. *NeuroImage* [Internet]. 2010  
937 Jan 1 [cited 2016 Mar 3];49(1):694–702. Available from: <http://www.sciencedirect.com/science/article/pii/S1053811909009616>
- 939 Peters L, De Smedt B, Op de Beeck H. The neural representation of arabic digits in visual cortex. *Front Hum*  
940 *Neurosci* [Internet]. 2015 [cited 2018 Jan 29];9. Available from: <https://www.frontiersin.org/articles/10.3389/fnhum.2015.00517/full>
- 942 Pilgramm S, Haas B de, Helm F, Zentgraf K, Stark R, Munzert J, et al. Motor imagery of hand actions: Decoding  
943 the content of motor imagery from brain activity in frontal and parietal motor areas. *Hum Brain Mapp* [Internet].  
944 2016 Jan 1 [cited 2018 Feb 6];37(1):81–93. Available from: <http://onlinelibrary.wiley.com/doi/10.1002/hbm.23015/abstract>
- 946 Pinsard B, Boutin A, Doyon J, Benali H. Integrated fMRI preprocessing framework using extended kalman filter  
947 for estimation of slice-wise motion. *Front Neurosci*. 2018;
- 948 Ramnani N. The primate cortico-cerebellar system: Anatomy and function. *Nature Reviews Neuroscience*  
949 [Internet]. 2006 Jul [cited 2018 Mar 20];7(7):511–22. Available from: <https://www.nature.com/articles/nrn1953>
- 950 Rasch B, Born J. Reactivation and consolidation of memory during sleep. *Current Directions in Psychological*  
951 *Science* [Internet]. 2008 Jun 1 [cited 2013 May 22];17(3):188–92. Available from: <http://cdp.sagepub.com/content/17/3/188>
- 953 Reithler J, Mier HI van, Goebel R. Continuous motor sequence learning: Cortical efficiency gains accompanied by  
954 striatal functional reorganization. *NeuroImage* [Internet]. 2010 Aug 1 [cited 2018 Apr 6];52(1):263–76. Available  
955 from: <http://www.sciencedirect.com/science/article/pii/S1053811910003605>
- 956 Robertson EM, Tormos JM, Maeda F, Pascual-Leone A. The role of the dorsolateral prefrontal cortex during  
957 sequence learning is specific for spatial information. *Cereb Cortex* [Internet]. 2001 Jul 1 [cited 2018 Feb  
958 13];11(7):628–35. Available from: <https://academic.oup.com/cercor/article/11/7/628/317510>
- 959 Shum J, Hermes D, Foster BL, Dastjerdi M, Rangarajan V, Winawer J, et al. A brain area for visual numerals. *J*  
960 *Neurosci* [Internet]. 2013 Apr 17 [cited 2018 Jan 29];33(16):6709–15. Available from: <http://www.jneurosci.org/content/33/16/6709>
- 962 Smith SM, Nichols TE. Threshold-free cluster enhancement: Addressing problems of smoothing, threshold  
963 dependence and localisation in cluster inference. *NeuroImage* [Internet]. 2009 Jan 1 [cited 2018 Feb 28];44(1):83–  
964 98. Available from: <http://www.sciencedirect.com/science/article/pii/S1053811908002978>
- 965 Tomassini V, Jbabdi S, Kincses ZT, Bosnell R, Douaud G, Pozzilli C, et al. Structural and functional bases for  
966 individual differences in motor learning. *Hum Brain Mapp* [Internet]. 2011 Mar 1 [cited 2018 Feb 14];32(3):494–  
967 508. Available from: <http://onlinelibrary.wiley.com/doi/10.1002/hbm.21037/abstract>
- 968 Ungerleider LG, Doyon J, Karni A. Imaging brain plasticity during motor skill learning. *Neurobiology of Learning*

- 969 and Memory [Internet]. 2002 Nov [cited 2015 Nov 2];78(3):553–64. Available from: <http://www.sciencedirect.com/science/article/pii/S1074742702940918>
- 970
- 971 Vahdat S, Fogel S, Benali H, Doyon J. Network-wide reorganization of procedural memory during NREM sleep  
972 revealed by fMRI. *eLife Sciences* [Internet]. 2017 Sep 11 [cited 2017 Sep 26];6:e24987. Available from: <https://elifesciences.org/articles/24987>
- 973
- 974 Vahdat S, Lungu O, Cohen-Adad J, Marchand-Pauvert V, Benali H, Doyon J. Simultaneous brain–Cervical cord fMRI  
975 reveals intrinsic spinal cord plasticity during motor sequence learning. *PLoS Biol* [Internet]. 2015 [cited 2016 Mar  
976 8];13(6):e1002186. Available from: <http://journals.plos.org/plosbiology/article?id=10.1371/journal.pbio.1002186>
- 977 Varoquaux G. Cross-validation failure: Small sample sizes lead to large error bars. *NeuroImage* [Internet]. 2017  
978 Jun 24 [cited 2018 Feb 27]; Available from: <http://www.sciencedirect.com/science/article/pii/S1053811917305311>
- 979 Verwey WB, Shea CH, Wright DL. A cognitive framework for explaining serial processing and sequence execution  
980 strategies. *Psychon Bull Rev* [Internet]. 2015 Feb 1 [cited 2017 Nov 24];22(1):54–77. Available from: <https://link.springer.com/article/10.3758/s13423-014-0773-4>
- 981
- 982 Walther A, Nili H, Ejaz N, Alink A, Kriegeskorte N, Diedrichsen J. Reliability of dissimilarity measures for multi-  
983 voxel pattern analysis. *NeuroImage* [Internet]. 2016 Aug 15 [cited 2017 Aug 15];137:188–200. Available from:  
984 <http://www.sciencedirect.com/science/article/pii/S1053811915011258>
- 985 Waters S, Wiestler T, Diedrichsen J. Cooperation not competition: Bihemispheric tDCS and fMRI show role for  
986 ipsilateral hemisphere in motor learning. *J Neurosci* [Internet]. 2017 Aug 2 [cited 2018 Feb 6];37(31):7500–12.  
987 Available from: <http://www.jneurosci.org/content/37/31/7500>
- 988 Waters-Metenier S, Husain M, Wiestler T, Diedrichsen J. Bihemispheric transcranial direct current stimulation  
989 enhances effector-independent representations of motor synergy and sequence learning. *J Neurosci* [Internet].  
990 2014 Jan 15 [cited 2018 Feb 6];34(3):1037–50. Available from: <http://www.jneurosci.org/content/34/3/1037>
- 991 Wiestler T, Diedrichsen J. Skill learning strengthens cortical representations of motor sequences. *eLife Sciences*  
992 [Internet]. 2013 Jul 9 [cited 2015 Apr 17];2:e00801. Available from: <http://elifesciences.org/content/2/e00801>
- 993 Wiestler T, McGonigle DJ, Diedrichsen J. Integration of sensory and motor representations of single fingers in  
994 the human cerebellum. *Journal of Neurophysiology* [Internet]. 2011 Jun 1 [cited 2016 Mar 21];105(6):3042–53.  
995 Available from: <http://jn.physiology.org/content/105/6/3042>
- 996 Wiestler T, Waters-Metenier S, Diedrichsen J. Effector-independent motor sequence representations exist in  
997 extrinsic and intrinsic reference frames. *J Neurosci* [Internet]. 2014 Apr 2 [cited 2015 Apr 17];34(14):5054–64.  
998 Available from: <http://www.jneurosci.org/content/34/14/5054>
- 999 Wu T, Kansaku K, Hallett M. How self-initiated memorized movements become automatic: A functional MRI  
1000 study. *Journal of Neurophysiology* [Internet]. 2004 Apr 1 [cited 2018 Mar 29];91(4):1690–8. Available from:  
1001 <https://www.physiology.org/doi/abs/10.1152/jn.01052.2003>
- 1002 Yin HH, Mulcare SP, Hilário MRF, Clouse E, Holloway T, Davis MI, et al. Dynamic reorganization of striatal circuits  
1003 during the acquisition and consolidation of a skill. *Nature Neuroscience* [Internet]. 2009 Mar [cited 2018 Mar  
1004 15];12(3):333–41. Available from: <https://www.nature.com/articles/nn.2261>
- 1005 Yokoi A, Arbuckle SA, Diedrichsen J. Does human primary motor cortex represent sequences of finger move-  
1006 ments? *bioRxiv* [Internet]. 2017 Jun 29 [cited 2017 Nov 21];157438. Available from: <https://www.biorxiv.org/content/early/2017/06/29/157438>
- 1007
- 1008 Yousry TA, Schmid UD, Alkadhi H, Schmidt D, Peraud A, Buettner A, et al. Localization of the motor hand area to  
1009 a knob on the precentral gyrus. a new landmark. *Brain* [Internet]. 1997 Jan 1 [cited 2018 Mar 21];120(1):141–57.  
1010 Available from: <https://academic.oup.com/brain/article/120/1/141/312820>
